# Supplementary material for: Calcium phosphate engineered photosynthetic microalgae to combat hypoxic-tumor by in-situ modulating hypoxia and cascade radio-phototherapy
Source: Theranostics. 2021 Jan 22;11(8):3580–94. doi: 10.7150/thno.55441 (PMC7914342; doi:10.7150/thno.55441)
Supplement: Supplementary file 1 — Supplementary figures and tables. [file thnov11p3580s1.pdf]

## Supporting Information

### **Calcium Phosphate Engineered Photosynthetic Microalgae to Combat Hypoxic-Tumor by in-situ Modulating Hypoxia and Cascade Radio-Phototherapy**

Danni Zhong<sup>1,2</sup>, Wanlin Li<sup>2</sup>, Shiyuan Hua<sup>2</sup>, Yuchen Qi<sup>2</sup>, Zhe Tang<sup>1</sup>, and Min Zhou<sup>1,2,3,#</sup>

<sup>1</sup> Department of Surgery, the Fourth Affiliated Hospital, Zhejiang University School of Medicine, Yiwu 322000, China

<sup>2</sup> Institute of Translational Medicine, Zhejiang University, Hangzhou 310009, China

<sup>3</sup> State Key Laboratory of Modern Optical Instrumentations, Zhejiang University, Hangzhou, 310058, China

**# Address correspondence to**

zhoum@zju.edu.cn (Min Zhou);

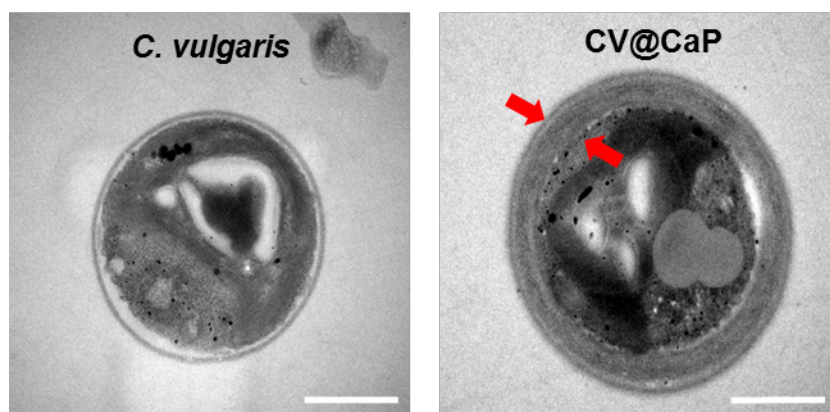

**Fig. S1.** TEM images of the bare *C. vulgaris* cell (left) and the mineralized CV@CaP cell (right), red arrows indicated the CaP shell. Scale bar = 1 μm.

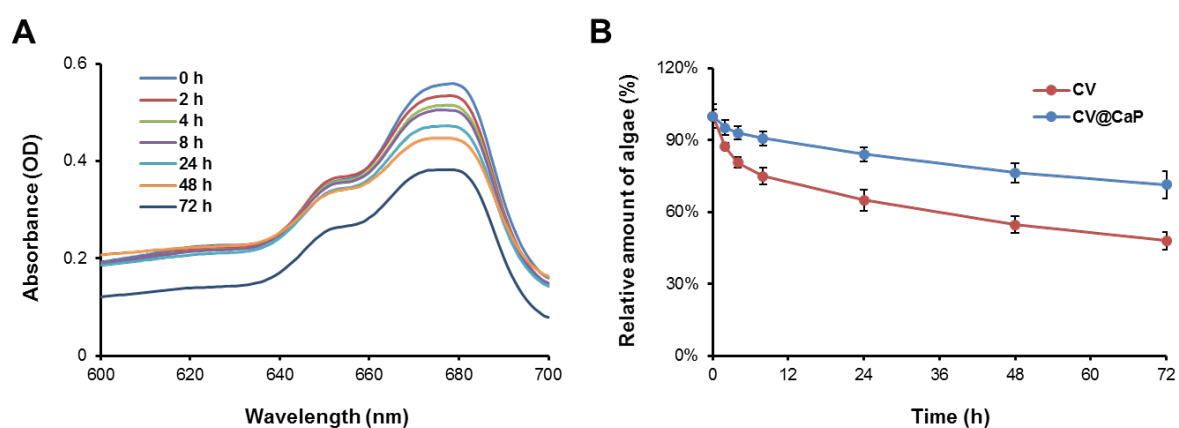

**Fig. S2.** Degradation of CV@CaP in 37°C PBS solution. (A) UV-Vis spectra of CV@CaP before degradation and after degradation of 2 h, 4 h, 8 h, 24 h, 48 h and 72 h, respectively. (B) Relative amount of CV and CV@CaP against degradation time.

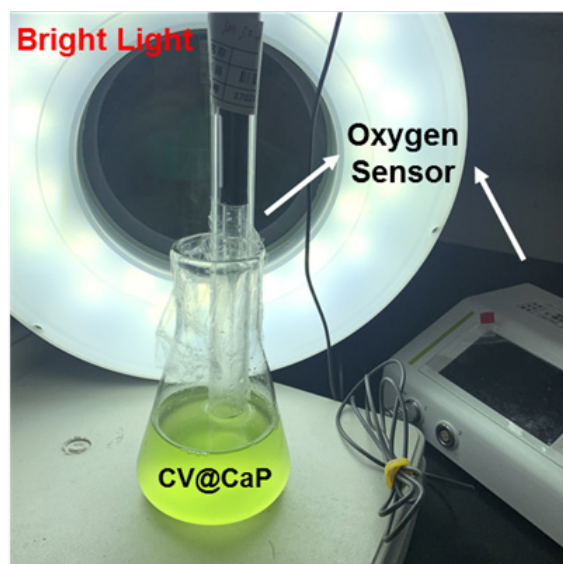

**Fig. S3.** Photograph of the oxygen sensor device testing the oxygen productions in the CV@CaP sample under the bright light.

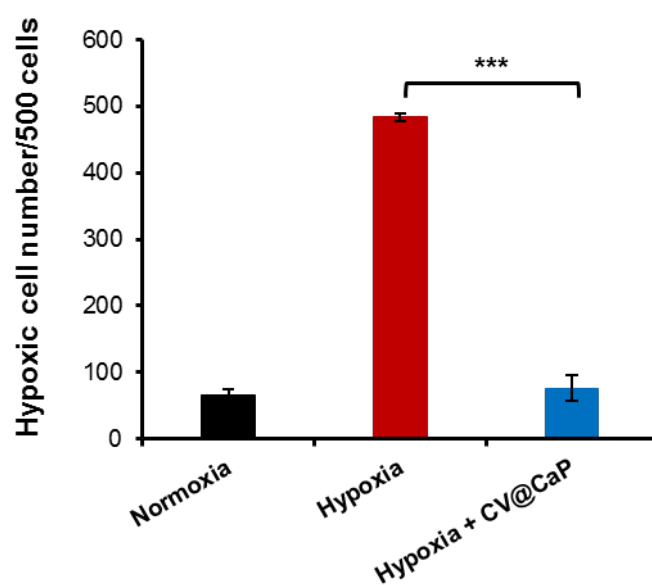

**Fig. S4.** Quantitative analysis of the hypoxic cell number after different treatments. \*\*\* $p < 0.001$ .

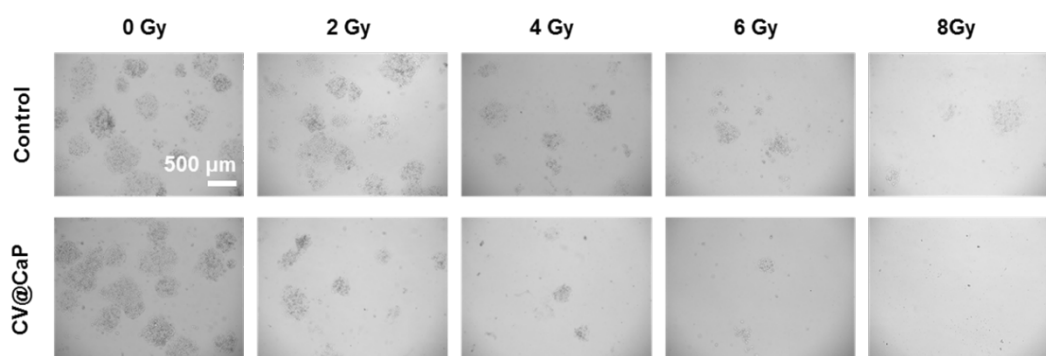

**Fig. S5.** Bright field images of the formation of 4T1 cell colonies after treated with or without CV@CaP under X-ray irradiation (0 to 8 Gy). Scale Bar = 500  $\mu\text{m}$ .

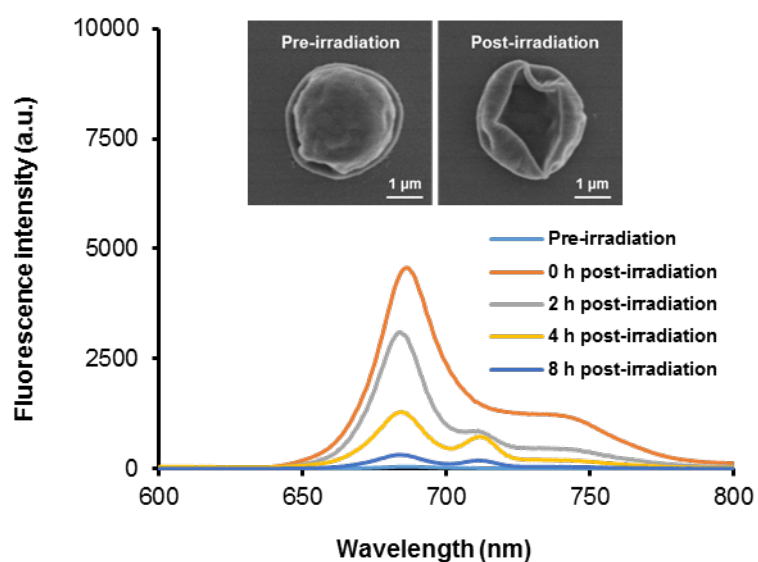

**Fig. S6.** Chlorophyll fluorescence intensity of the supernatant of CV@CaP collected pre- and post- X-ray irradiation (inset: SEM images of CV@CaP pre- and post-irradiation).

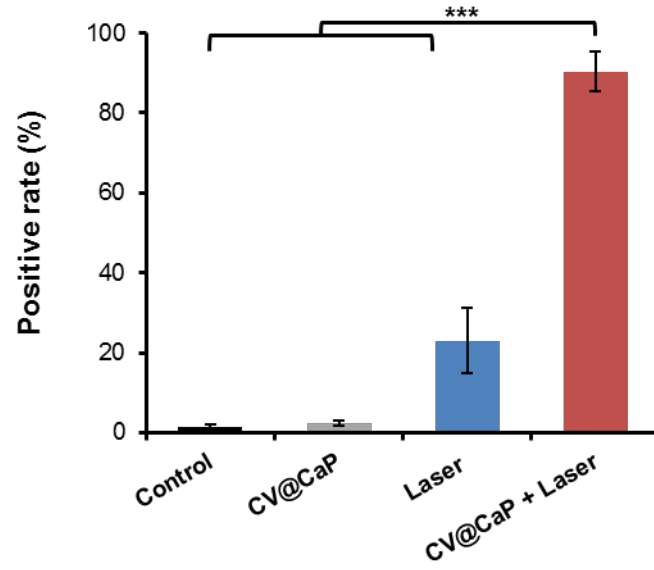

**Fig. S7.** Quantitative analysis of the ROS positive rate of each treatment in the fluorescence images.

\*\*\* $p < 0.001$ .

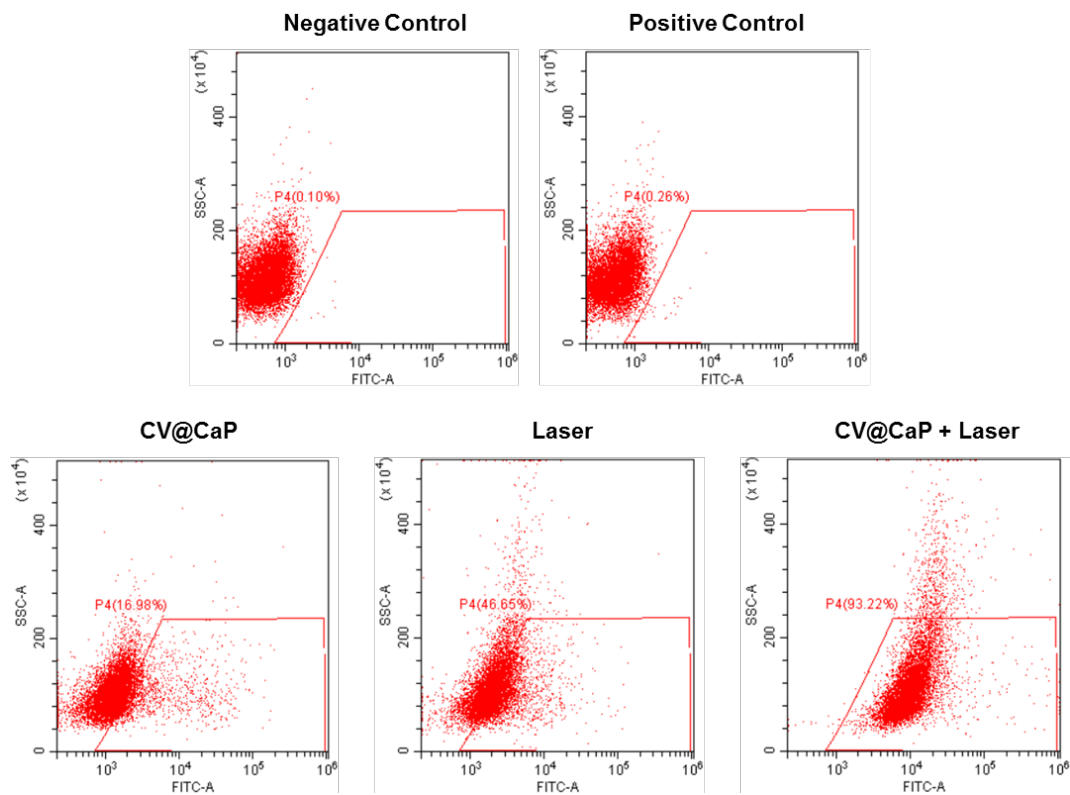

**Fig. S8.** Quantitative analysis of the ROS positive rate of each treatment in the flow cytometry analysis.

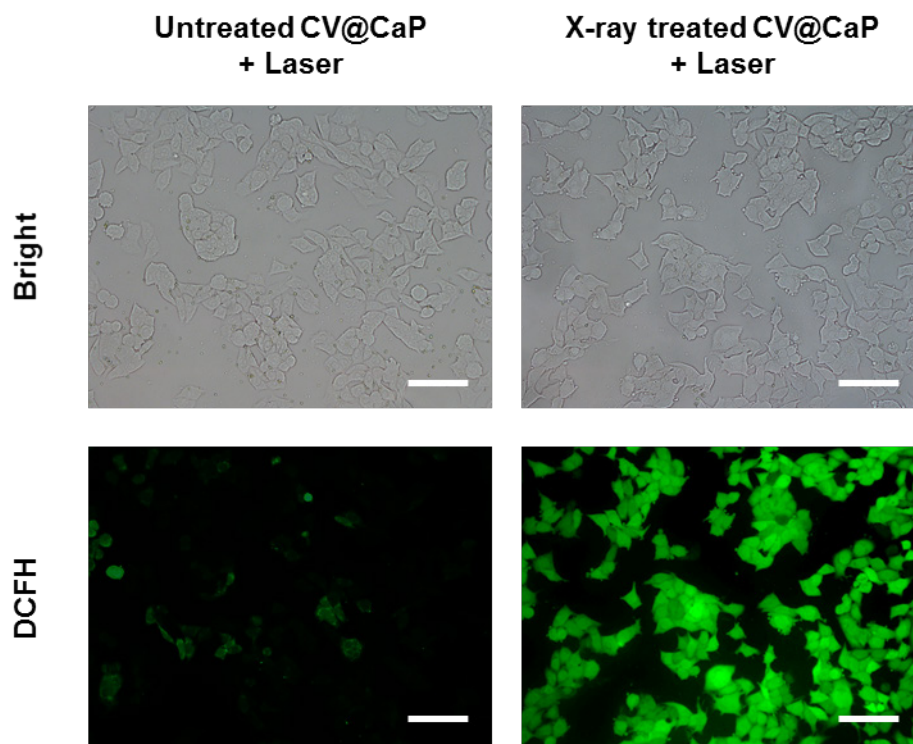

**Fig. S9.** Fluorescence images of 4T1 cells staining with DCFH-DA after administration with untreated CV@CaP + Laser or X-ray treated CV@CaP + Laser. Scale Bar = 100  $\mu$ m.

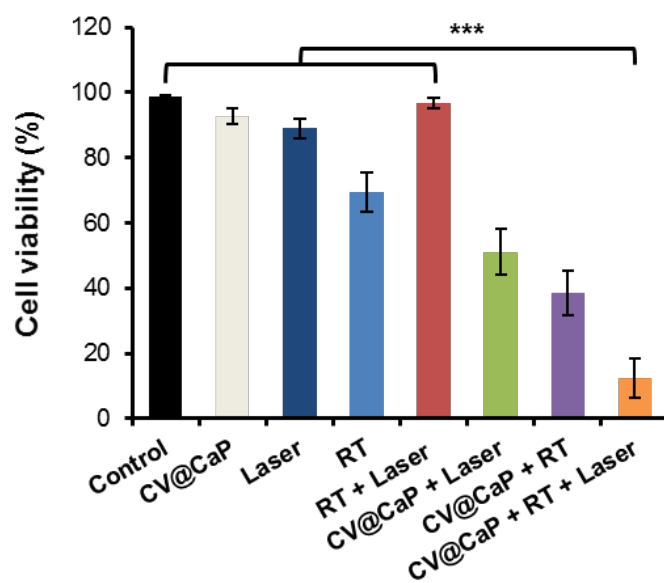

**Fig. S10.** Quantitative analysis of the cell viability of each group in live/dead staining assay. \*\*\* $p < 0.001$ .

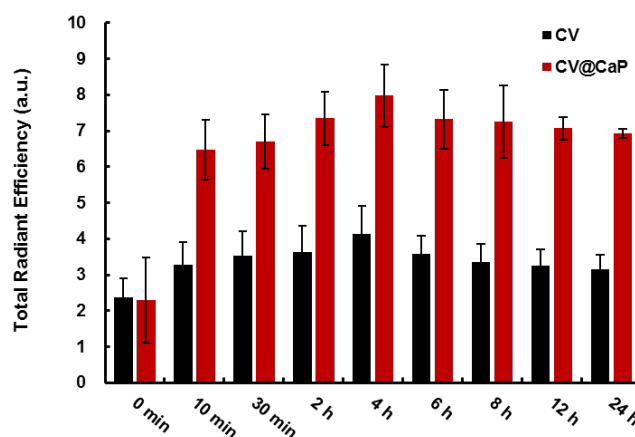

**Fig. S11.** Quantitative analysis of the total radiant efficiency at the tumor sites after intravenous injection of CV and CV@CaP.

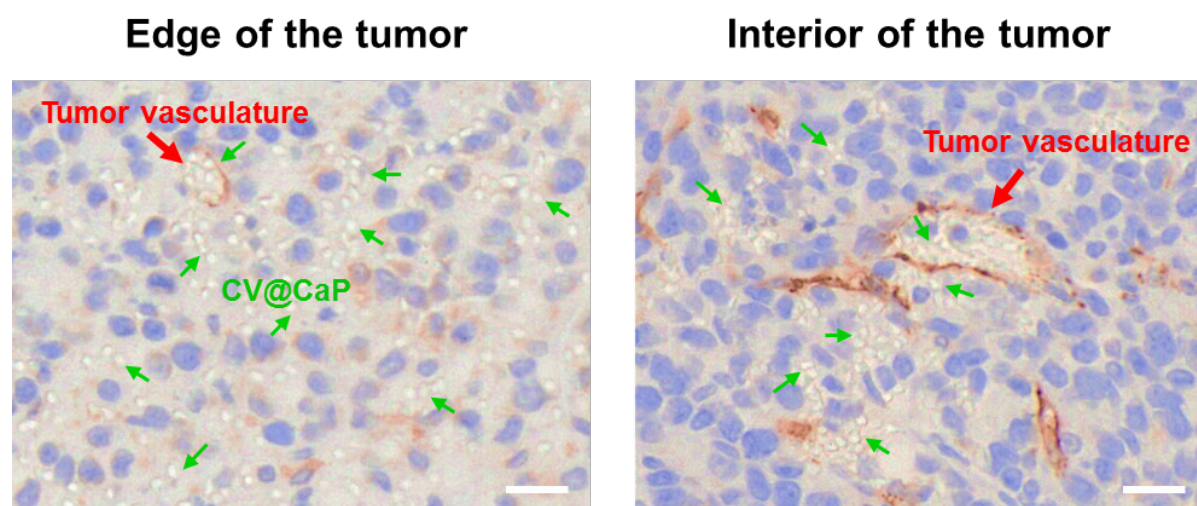

**Fig. S12.** CD31 staining of tumor tissue sections. Tumor vasculature was stained in brown, indicated by red arrows, and green arrows point to CV@CaP. Scale Bar = 20  $\mu\text{m}$ .

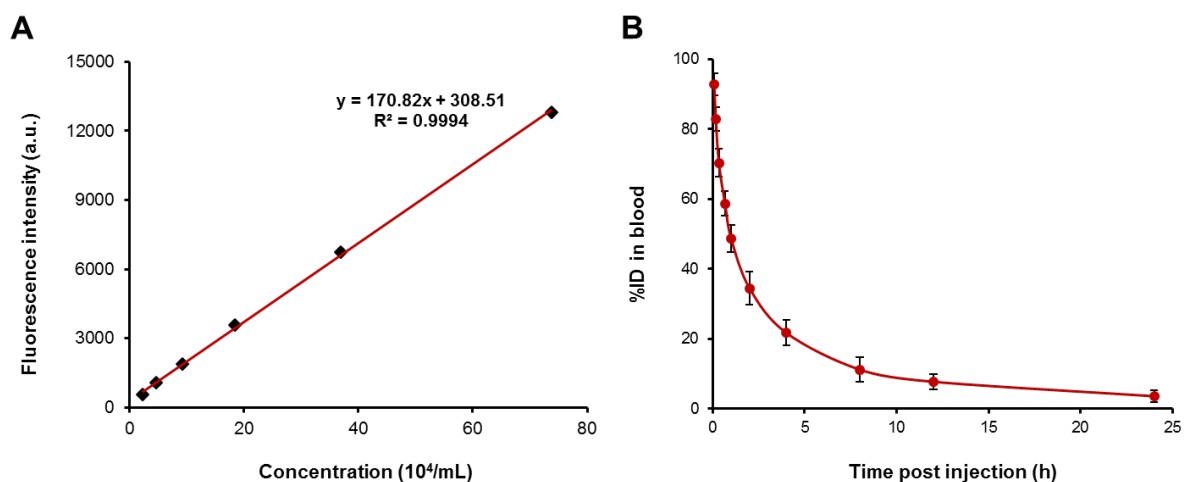

**Fig. S13.** (A) Fluorescence standard curve of CV@CaP in ethanol. (B) *In vivo* pharmacokinetic of CV@CaP in mice (n = 3) from 5 min to 24 h after intravenous administration. (Data is expressed as the percentage of the injected dose (% ID)).

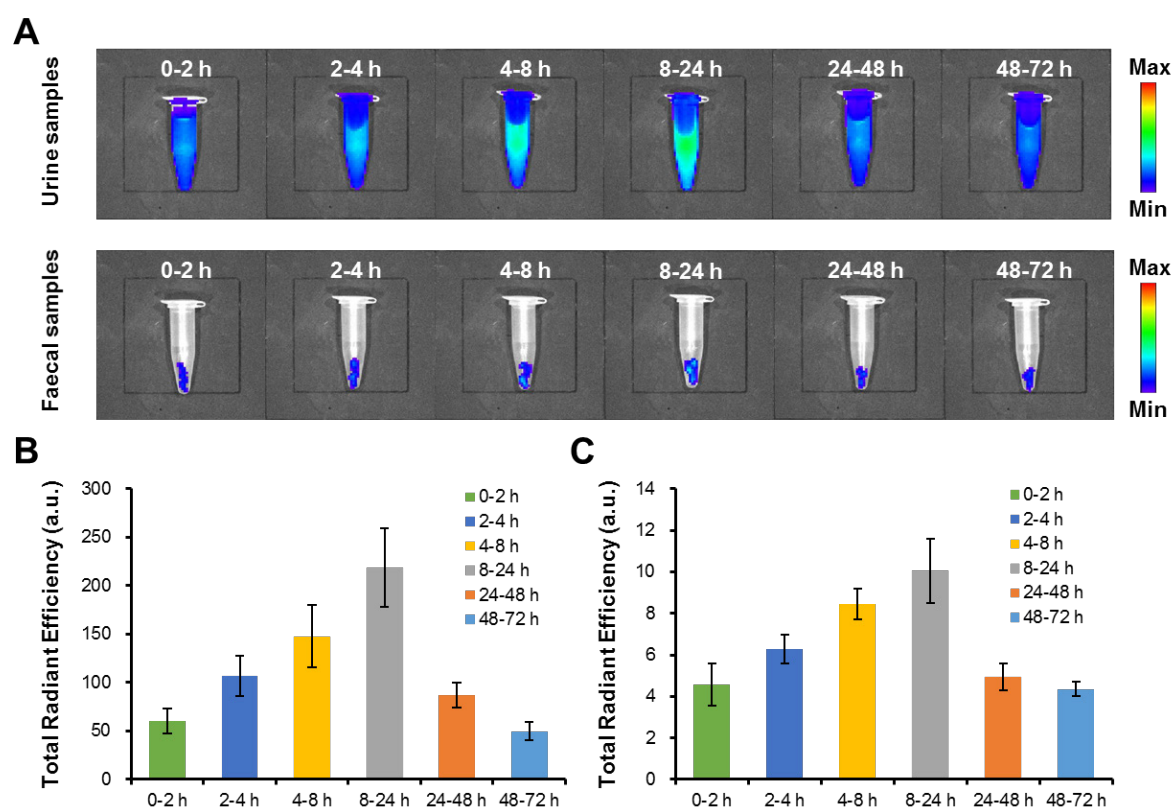

**Fig. S14.** Excretion analysis to evaluate renal and hepatic metabolism. (A) *Ex vivo* imaging of urine and faecal sample of mice (n = 3) collected at different times after i.v. injection of CV@CaP. (B) Quantitative analysis of the total radiant efficiency of different urine samples. (C) Quantitative analysis of the total radiant efficiency of different faecal samples.

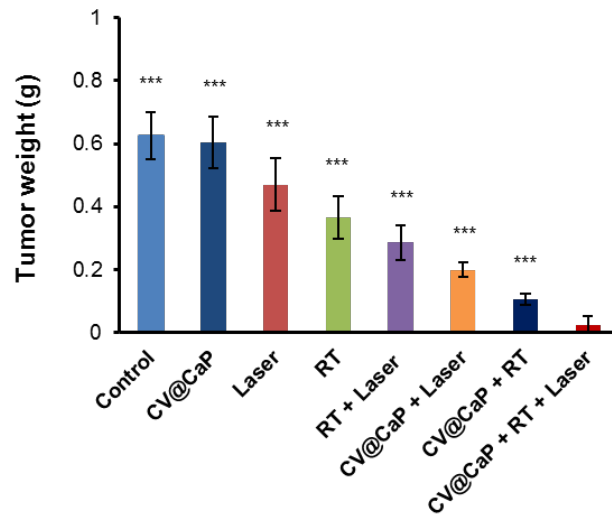

**Fig. S15.** Measurement of the tumor weight after various treatments.

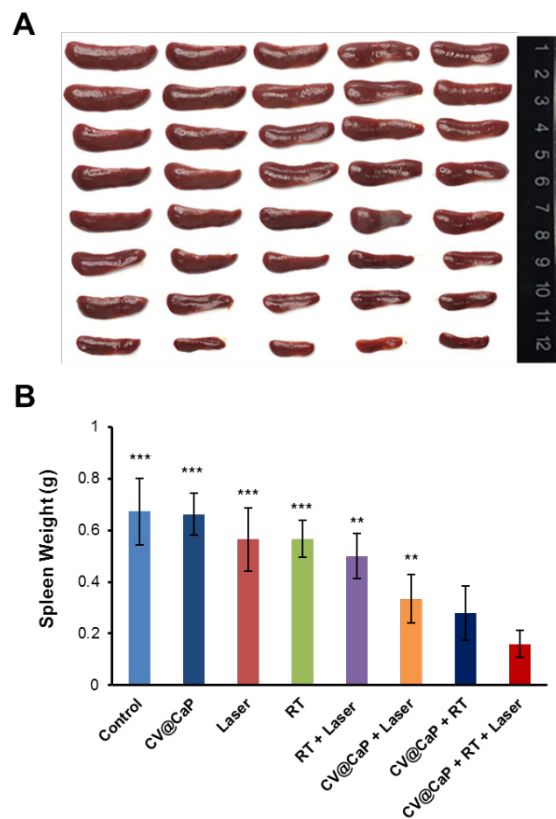

**Fig. S16.** (A) Photograph of the dissected spleens at 18 days in different groups. (B) Measurement of the spleen weight after various treatments. \*\* $p < 0.01$ , \*\*\* $p < 0.001$ .

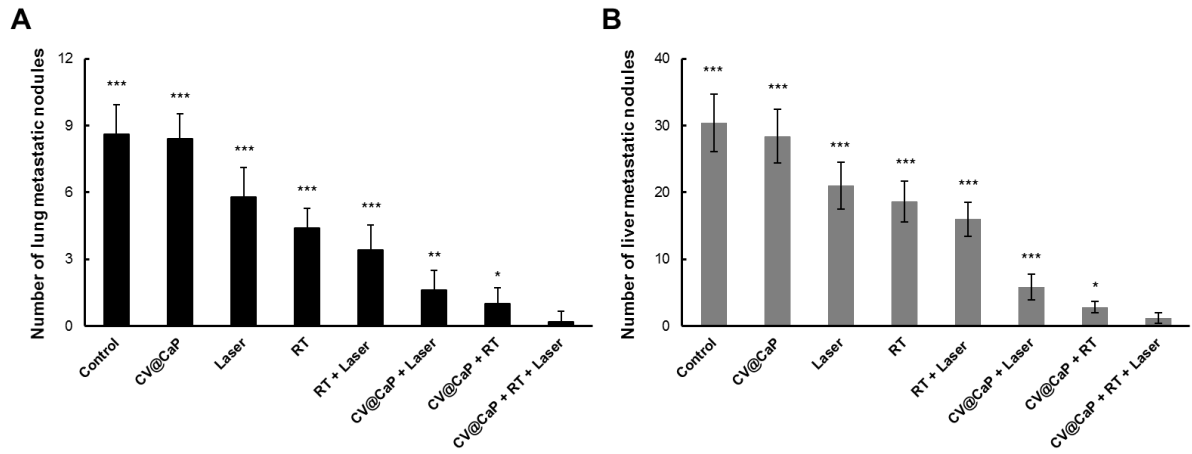

**Fig. S17.** The mean metastatic nodules of (A) lung and (B) liver tissues at 18 days in different groups. \* $p < 0.05$ , \*\* $p < 0.01$ , \*\*\* $p < 0.001$ .

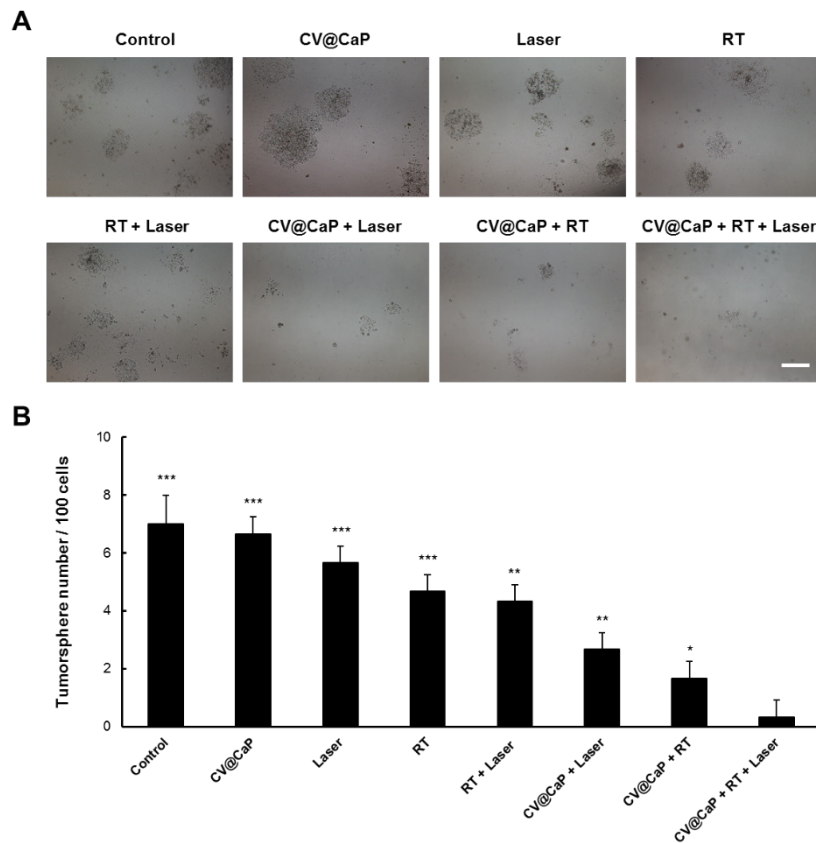

**Fig. S18.** (A) Representative images of 4T1 primary tumorsphere size 10 d after various treatments. (B) Quantitative analysis of the 4T1 primary tumorsphere formation 10 d after various treatments. \* $p < 0.05$ , \*\* $p < 0.01$ , \*\*\* $p < 0.001$ .

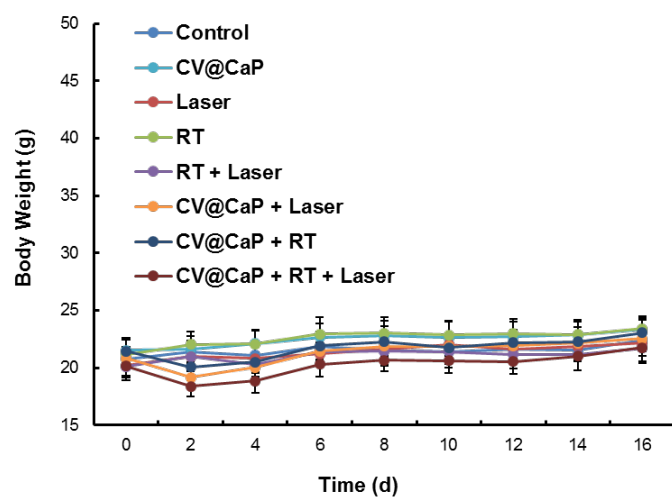

**Fig. S19.** Body weight of mice in different groups (n = 5). Treatments: Control; CV@CaP alone; Laser alone; RT alone; RT + Laser; CV@CaP + Laser; CV@CaP + RT; and CV@CaP + RT + Laser.

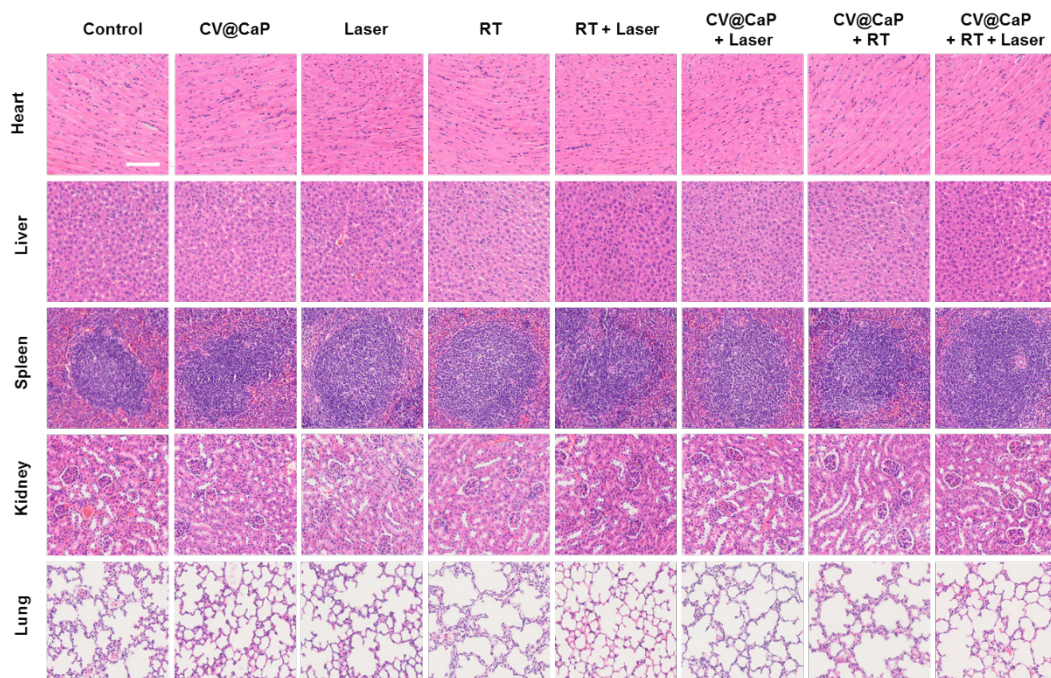

**Fig. S20.** H&E staining images of the major organs (Heart, Liver, Spleen, Kidney, and Lung) of the mice in each group (n = 5) at 18 days. Scale bar = 100  $\mu$ m.

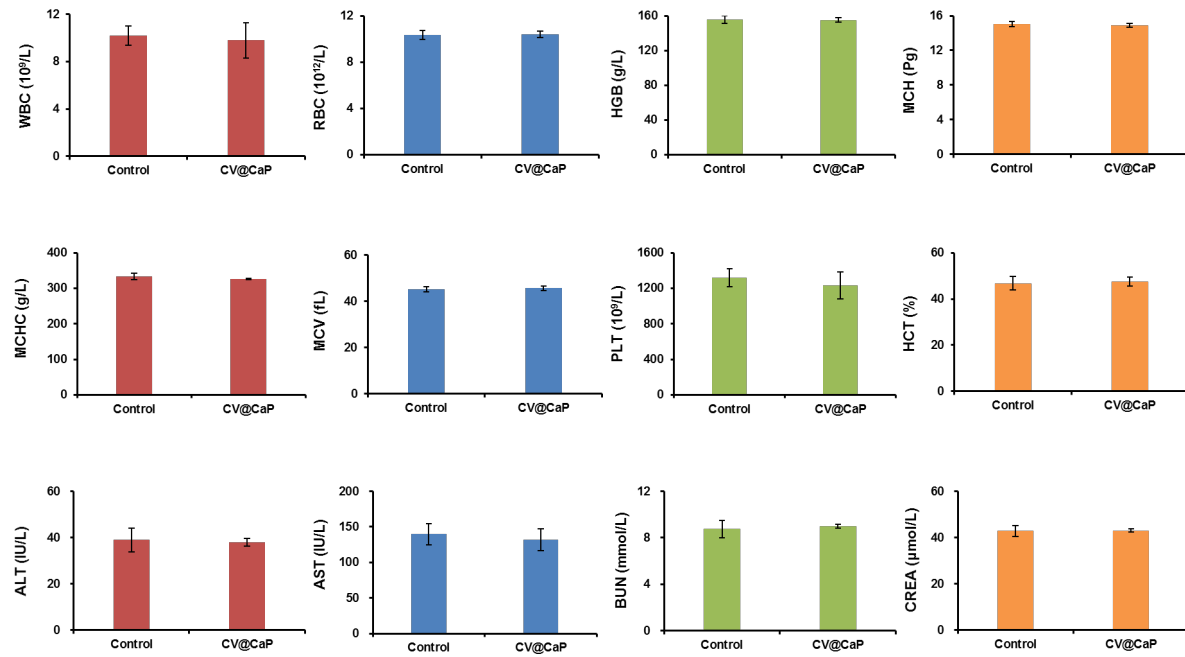

**Fig. S21.** Blood routine and blood biochemistry tests of the mice (n = 3) 30 d after i.v. injection of 200  $\mu$ L of PBS or CV@CaP ( $1 \times 10^7$  cells/mL). WBC, white blood cells; RBC, red blood cells; HGB, hemoglobin; MCH, mean corpuscular hemoglobin; MCHC, mean corpuscular hemoglobin concentration; MCV, mean cell volume; PLT, blood platelet; HCT, hematocrit; ALT, alanine transferase; AST, aspartate transferase; BUN, blood urea nitrogen; CREA, creatinine.
